# Supplementary material for: Challenges for Precise Subtyping and Sequencing of a H5N1 Clade 2.3.4.4b Highly Pathogenic Avian Influenza Virus Isolated in Japan in the 2022–2023 Season Using Classical Serological and Molecular Methods
Source: MDPI journal article supplement (doi:10.3390/v15112274), 2023-11-18
Supplement: s1 [file s1]

Supplementary Table S1. AIV reference strains used to produce antisera for HA subtyping used in this study (The antisera were kindly provided by OIE Reference Laboratory for AIV, Hokkaido University)

| <b>Strain</b>                     | <b>Subtype</b> |
|-----------------------------------|----------------|
| A/swine/Hokkaido/1/81             | H1N1           |
| A/duck/Hong Kong/278/78           | H2N9           |
| A/duck/Hokkaido/5/77              | H3N2           |
| A/duck/Czechoslovakia/56          | H4N6           |
| A/duck/Hong Kong/820/80           | H5N3           |
| A/shearwater/South Australia/1/72 | H6N5           |
| A/duck/Hong Kong/301/78           | H7N2           |
| A/turkey/Ontario/6118/67          | H8N4           |
| A/duck/Hong Kong/448/78           | H9N2           |
| A/chicken/Germany/N/49            | H10N7          |
| A/duck/England/1/56               | H11N6          |
| A/duck/Alberta/60/76              | H12N5          |
| A/gull/Maryland/704/77            | H13N6          |
| A/mallard/Astrakhan/263/82        | H14N5          |
| A/duck/Australia/341/83           | H15N8          |

Supplementary Table S2. Percentage nucleotide identify of the genes of A/white-tailed eagle/Japan/OU-1/2022 with its top 4 close relatives derived from BLAST analysis

| Gene | Close relatives                                           | Identity (%) |
|------|-----------------------------------------------------------|--------------|
| PB2  | A/jungle crow/Hokkaido/0104B087/2022 (H5N1)               | 99.87        |
|      | A/jungle crow/Hokkaido/0104B085/2022 (H5N1)               | 99.87        |
|      | A/jungle crow/Iwate/0304I001/2022 (H5N1)                  | 99.87        |
|      | A/white-fronted goose/Iwate/TU16-74/2022 (H5N1)           | 99.87        |
| PB1  | A/crow/Fukuoka/TU54-47/2023 (H5N1)                        | 99.67        |
|      | A/emu/Hokkaido/TU21-1,2/2022 (H5N1)                       | 99.43        |
|      | A/chicken/Miyagi/TU17-17,18/2022 (H5N1)                   | 99.39        |
|      | A/jungle crow/Hokkaido/0104B087/2022 (H5N1)               | 99.39        |
| PA   | A/emu/Hokkaido/TU21-1,2/2022 (H5N1)                       | 99.82        |
|      | A/chicken/Iwate/TU16-11,12/2022 (H5N1)                    | 99.82        |
|      | A/chicken/Miyagi/TU17-17,18/2022 (H5N1)                   | 99.82        |
|      | A/crow/Fukuoka/TU54-47/2023 (H5N1)                        | 99.82        |
| HA   | A/crow/Fukuoka/TU54-47/2023 (H5N1)                        | 99.94        |
|      | A/white-fronted goose/Iwate/TU16-74/2022 (H5N1)           | 99.77        |
|      | A/jungle crow/Iwate/0304I001/2022 (H5N1)                  | 99.77        |
|      | A/jungle crow/Hokkaido/0104B085/2022 (H5N1)               | 99.77        |
| NP   | A/crow/Fukuoka/TU54-47/2023 (H5N1)                        | 99.87        |
|      | A/jungle crow/Hokkaido/0104B085/2022 (H5N1)               | 99.81        |
|      | A/chicken/Iwate/TU16-11,12/2022 (H5N1)                    | 99.74        |
|      | A/chicken/Akita/TU22-31/2022 (H5N1)                       | 99.74        |
| NA   | A/crow/Fukuoka/TU54-47/2023(H5N1)                         | 99.86        |
|      | Influenza A/peregrine falcon/Niigata/NIES231/2022 (H5N1)  | 99.86        |
|      | A/greater white-fronted goose /Miyagi/NIES214/2022 (H5N1) | 99.86        |
|      | A/jungle crow/Hokkaido/0104B085/2022 (H5N1)               | 99.57        |
| M    | A/crow/Fukuoka/TU54-47/2023 (H5N1)                        | 99.9         |
|      | Influenza A virus (A/chicken/Iwate/TU16-11,12/2022 (H5N1) | 99.9         |
|      | A/jungle crow/Hokkaido/0104B087/2022 (H5N1)               | 99.9         |
|      | A/whooper swan/Iwate/0303B006/2022 (H5N1)                 | 99.9         |
| NS   | Influenza A virus (A/Mule-duck/France/21343/2021 (H5N1)   | 99.88        |
|      | Influenza A virus (A/pelican/Tumen/1032-1/2021 (H5N1)     | 99.88        |

---

|                                             |       |
|---------------------------------------------|-------|
| A/goose/Chelyabinsk/1341-3/2021 (H5N1))     | 99.88 |
| A/jungle crow/Hokkaido/0104B087/2022 (H5N1) | 99.88 |

---
