# Supplementary material for: Challenges for Precise Subtyping and Sequencing of a H5N1 Clade 2.3.4.4b Highly Pathogenic Avian Influenza Virus Isolated in Japan in the 2022–2023 Season Using Classical Serological and Molecular Methods
Source: MDPI journal article supplement (doi:10.3390/v15112274), 2023-11-18

# Supplementary Figure S1. PB2 gene (segment 1) phylogenetic tree

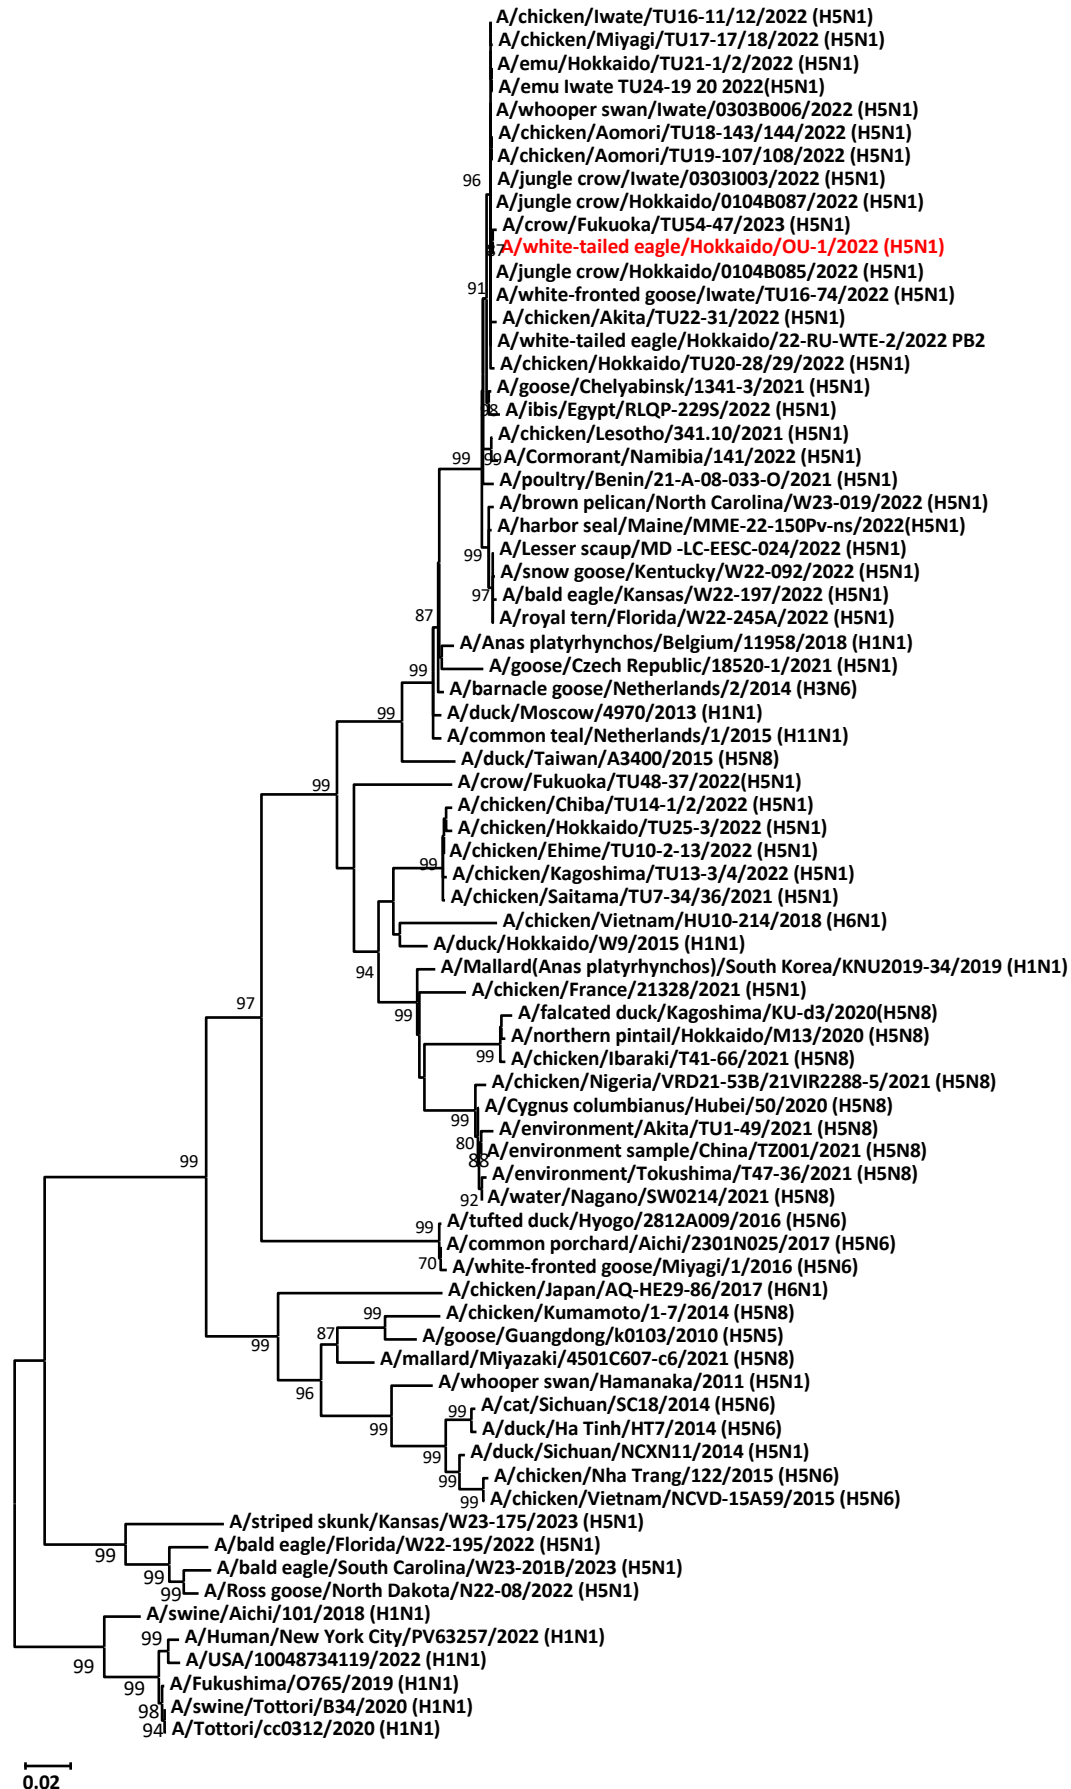

## Supplementary Figure S2. PB1 gene (segment 2) phylogenetic tree

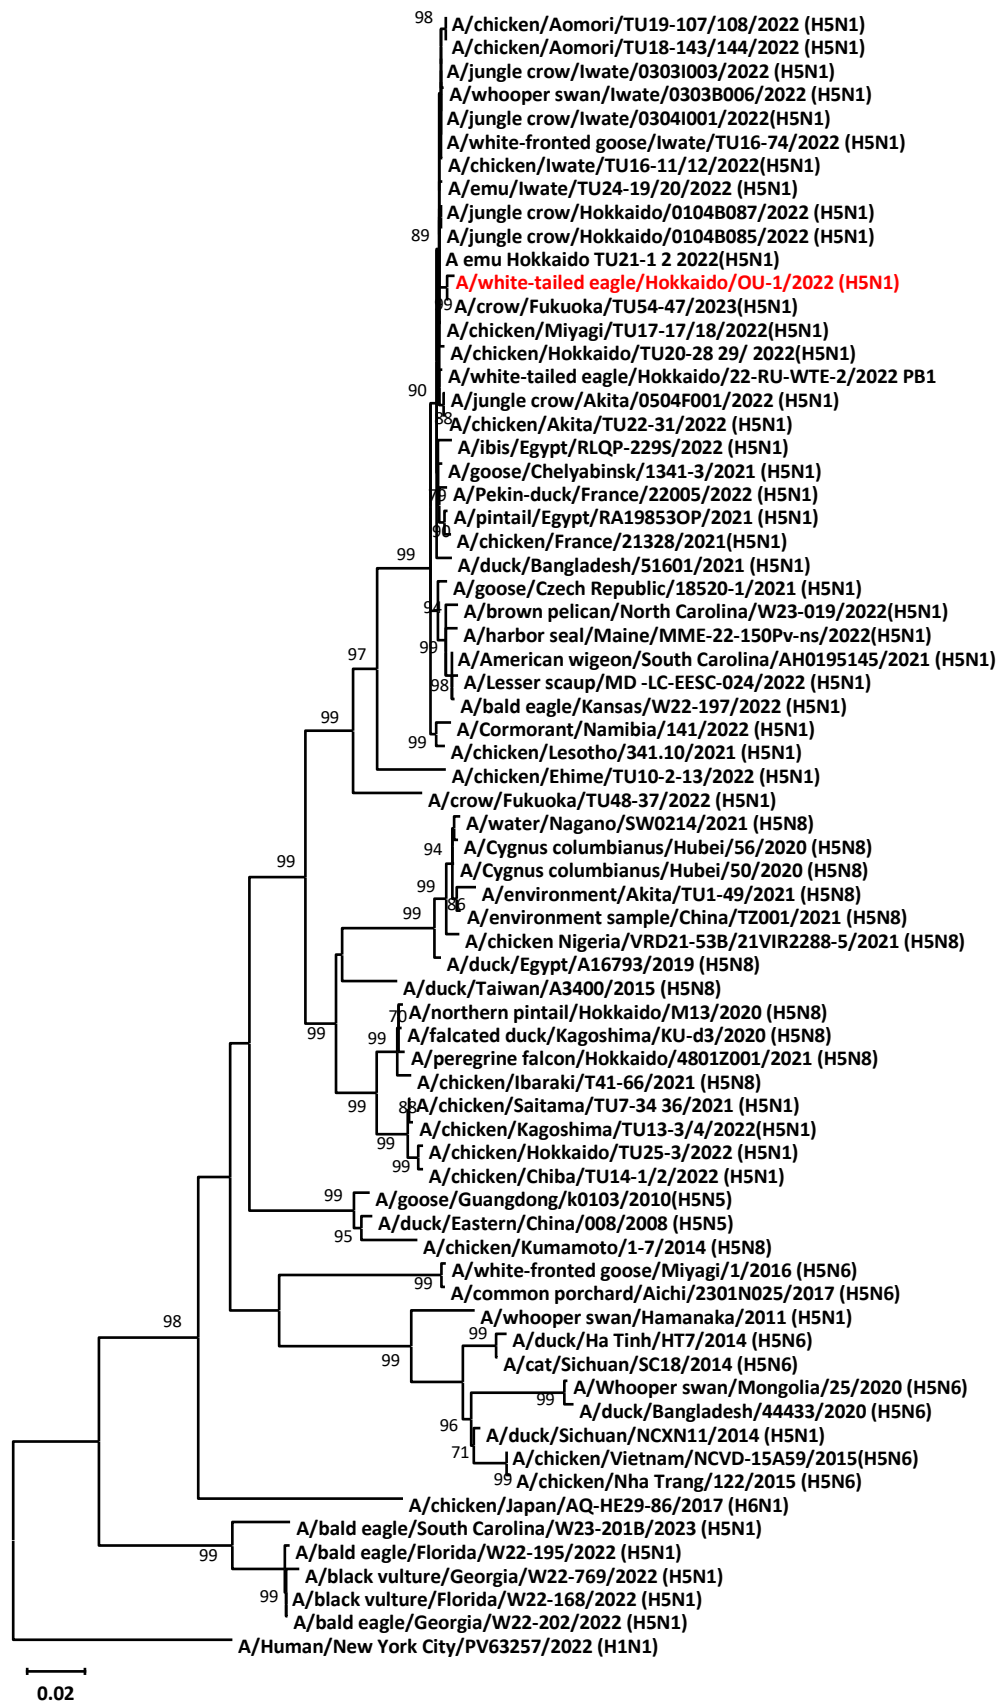

## Supplementary Figure S3. PA gene (segment 3) phylogenetic tree

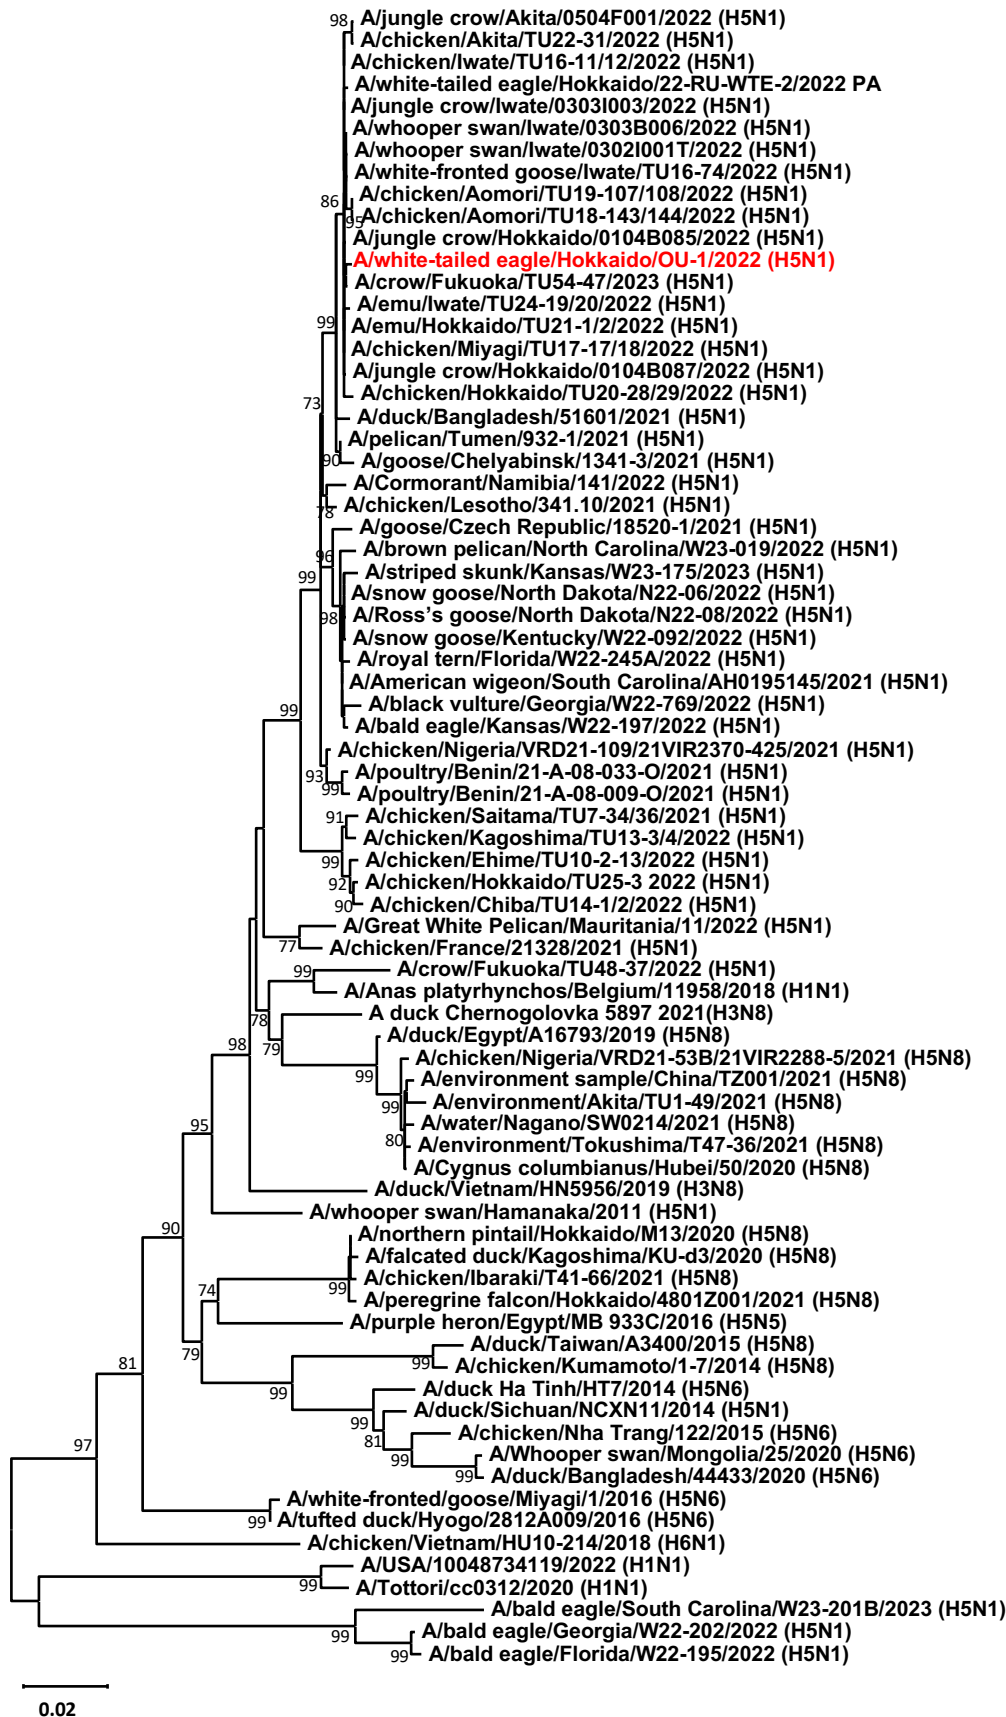

## Supplementary Figure S4. NP gene (segment 5) phylogenetic tree

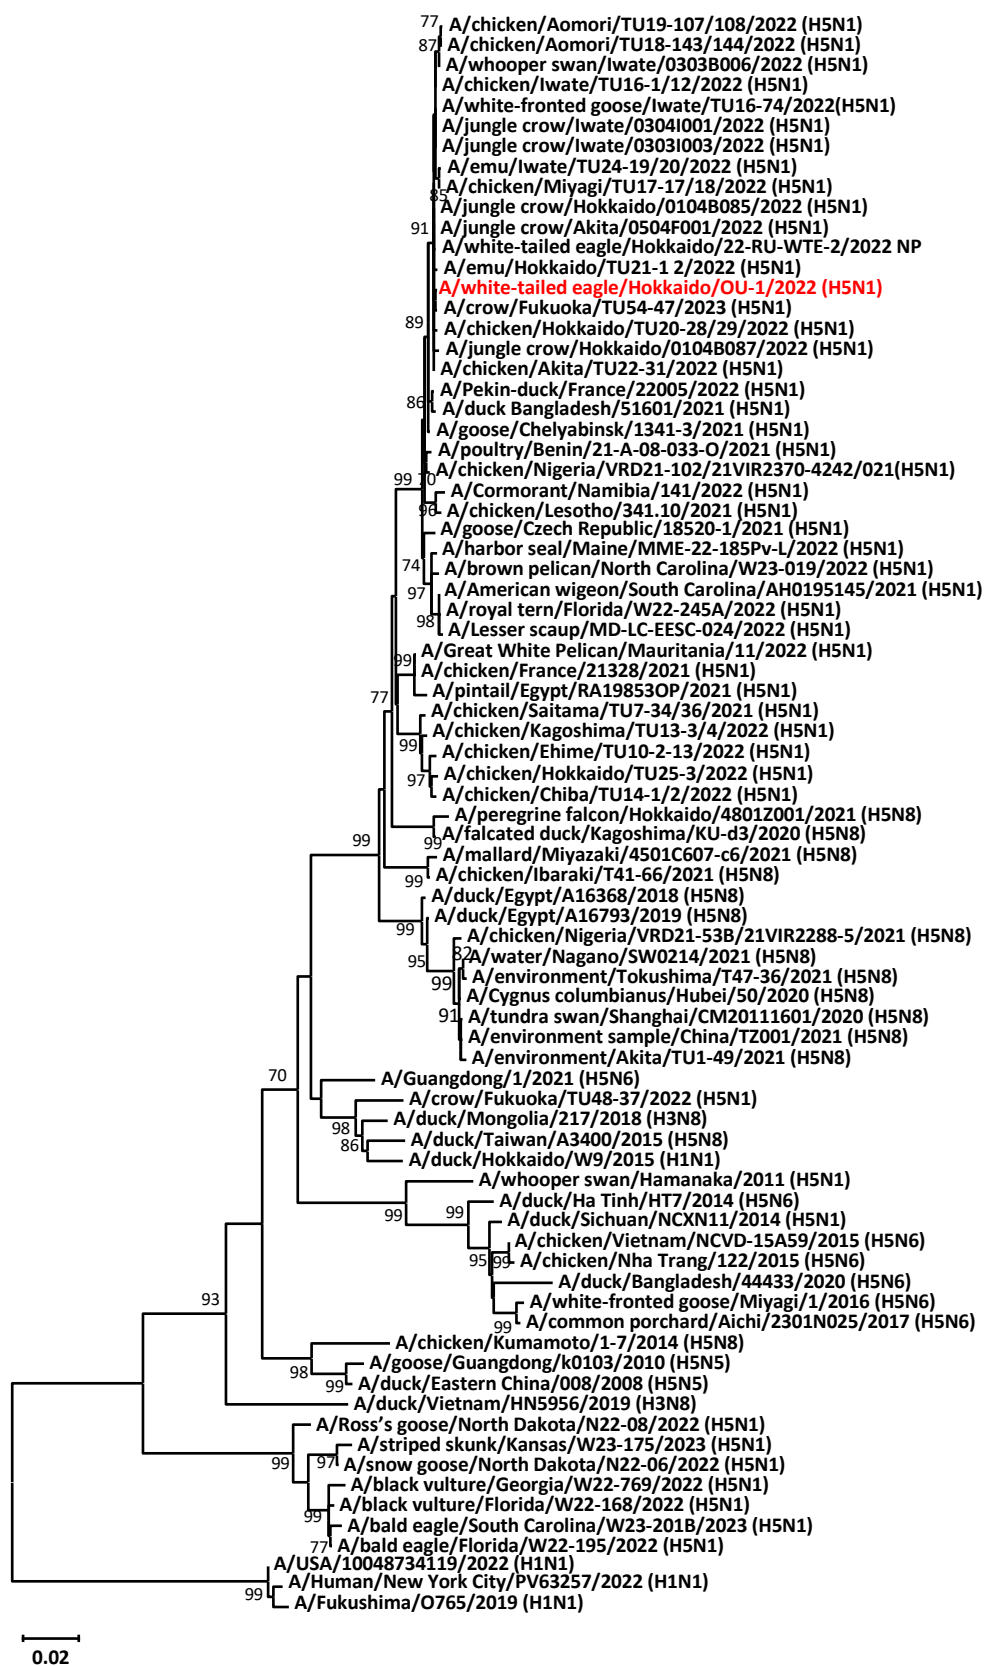

## Supplementary Figure S5. NA gene (segment 6) phylogenetic tree

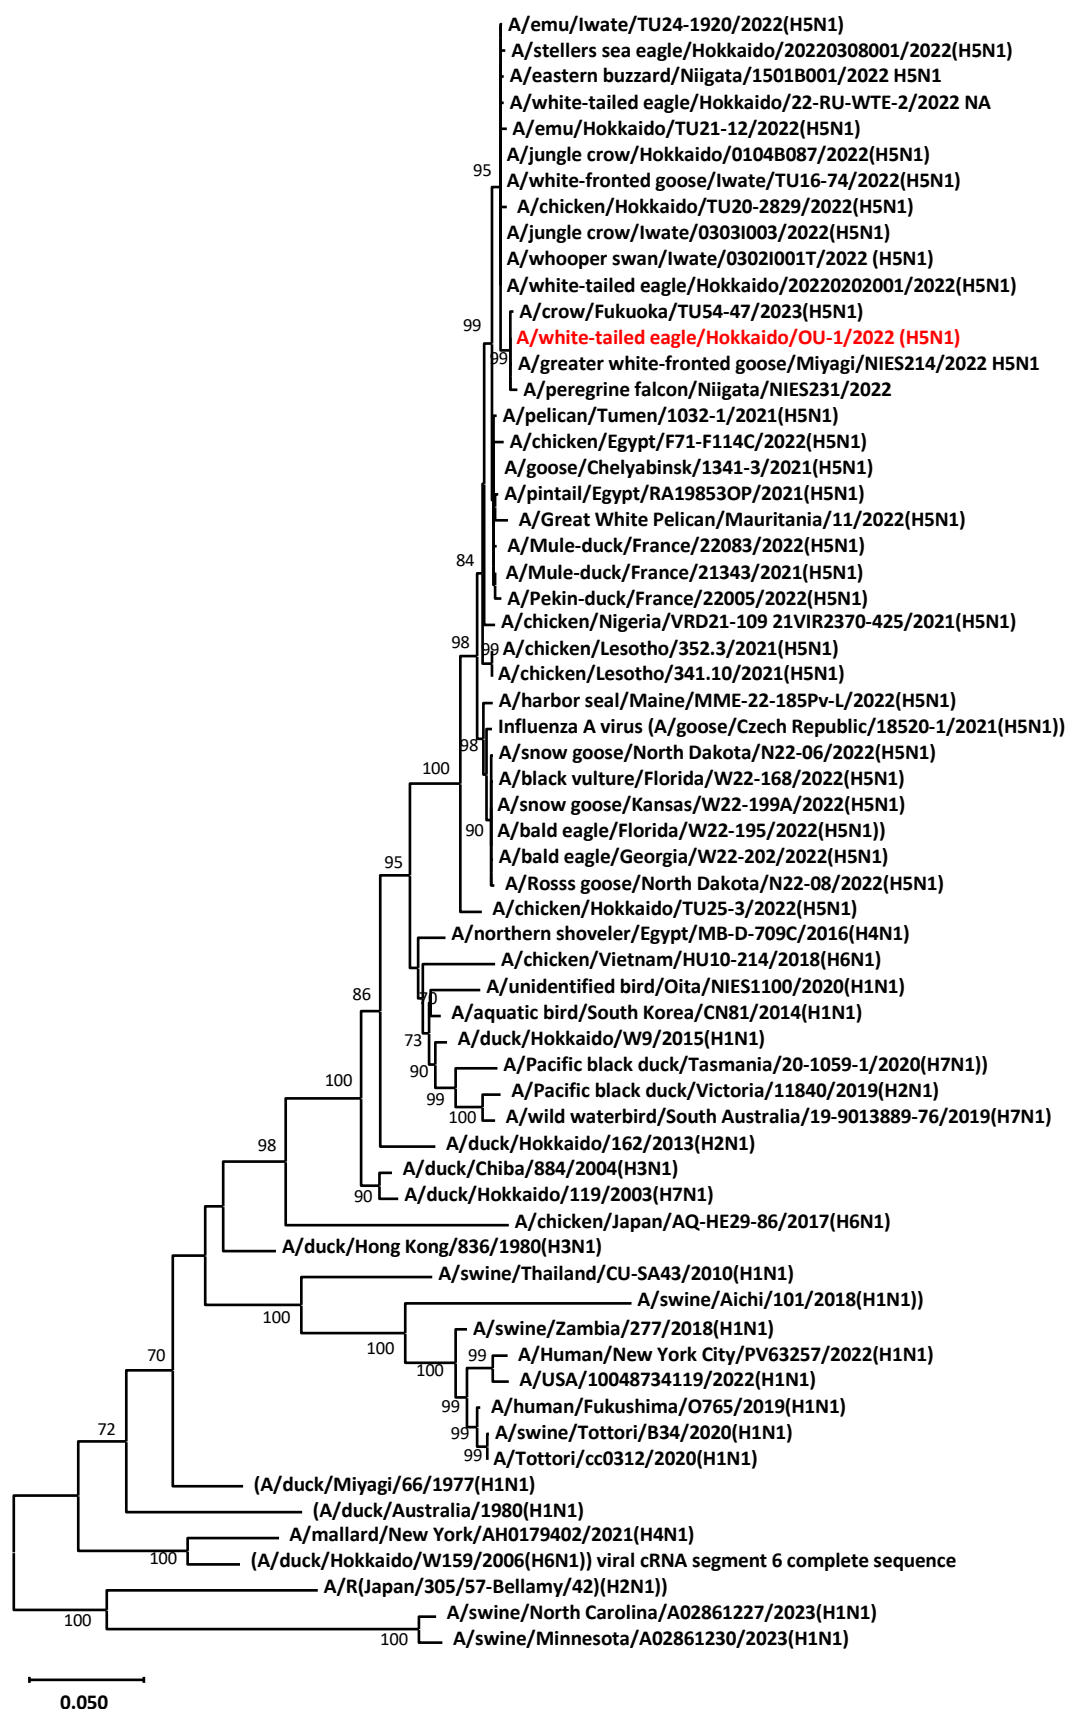



## Supplementary Figure S6. M gene (segment 7) phylogenetic tree

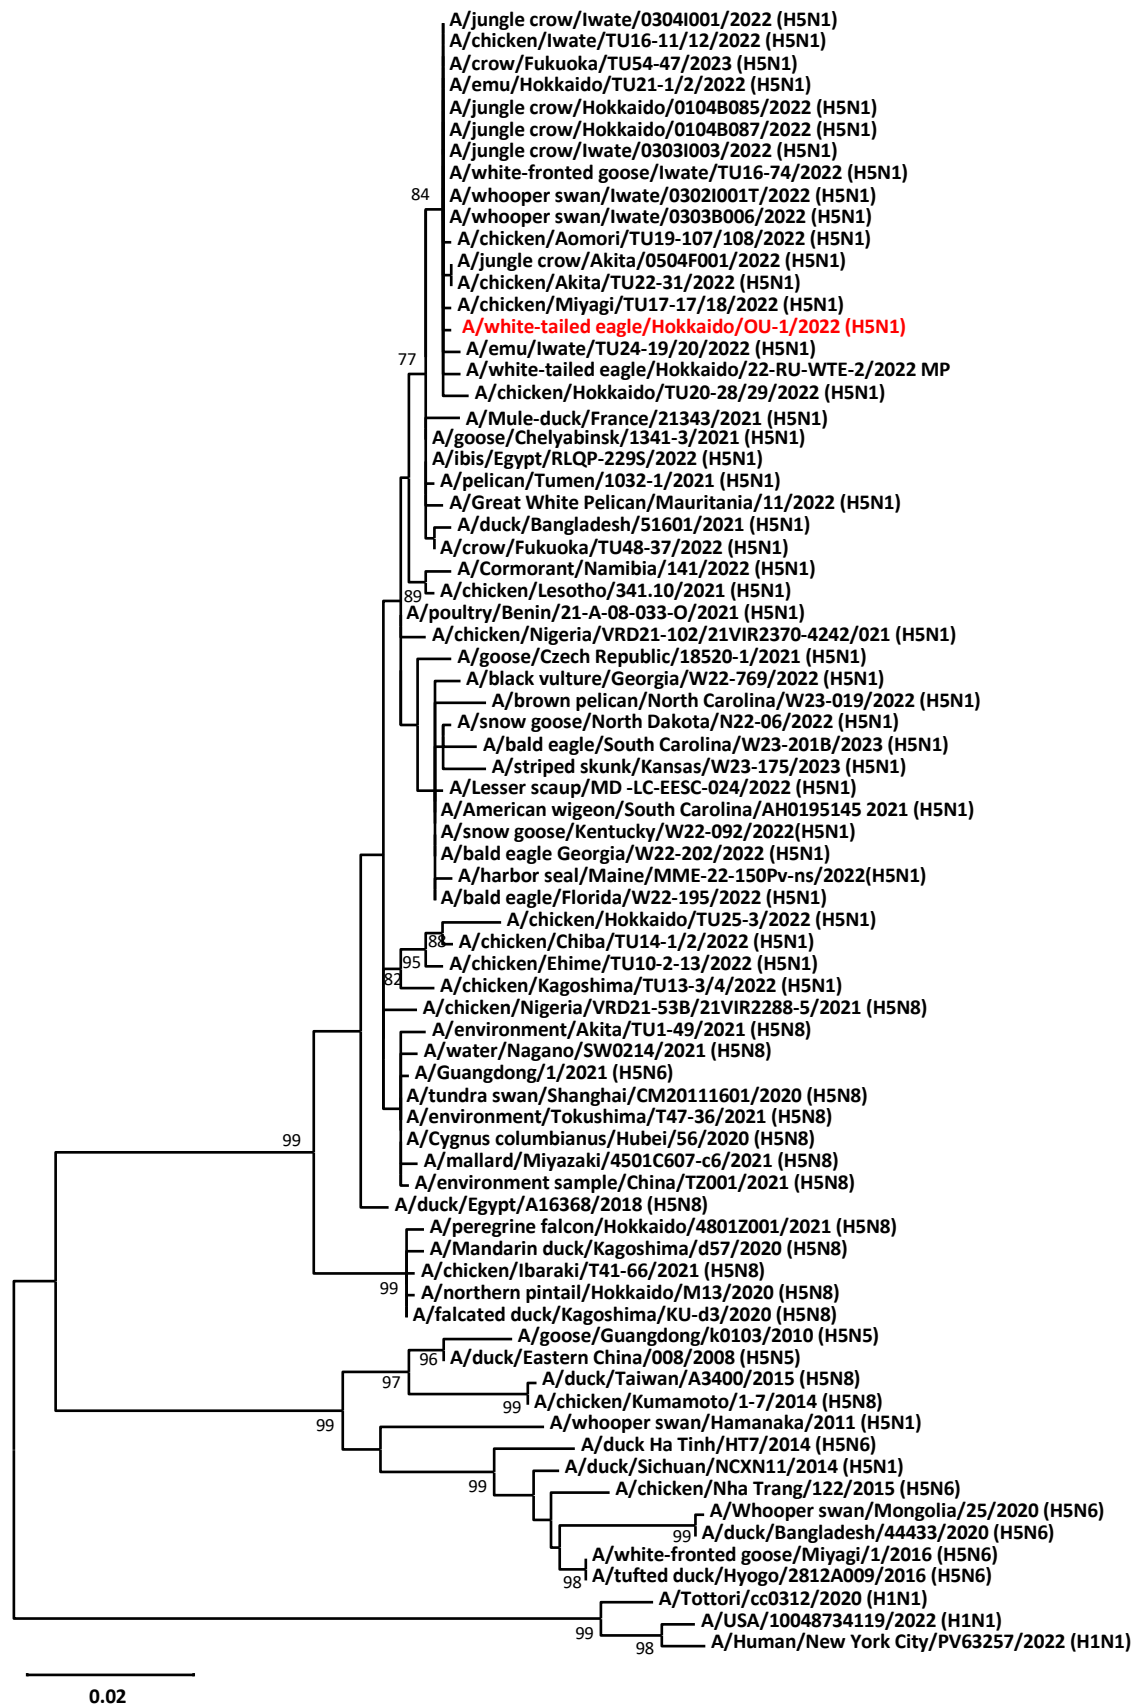

## Supplementary Figure S7. NS gene (segment 8) phylogenetic tree

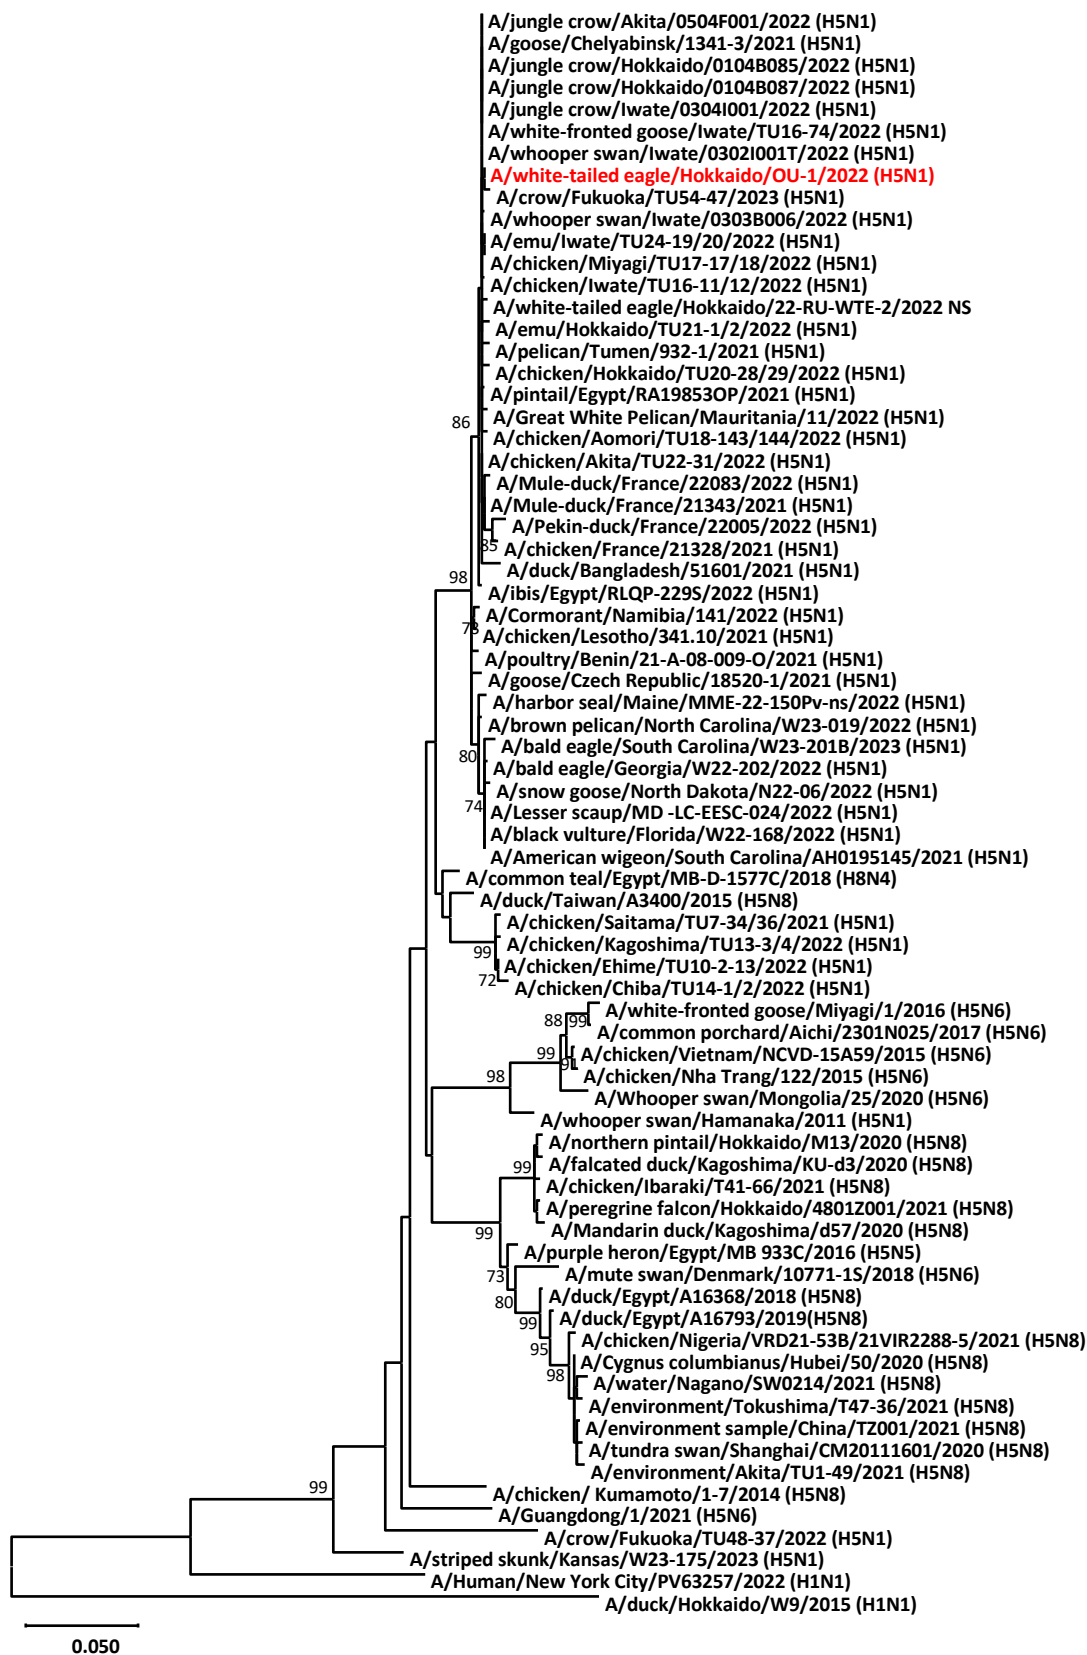

Supplement: s1 [file s1]
